# Supplementary material for: Psip1/Ledgf p75 restrains Hox gene expression by recruiting both trithorax and polycomb group proteins
Source: PubMed Central journal article supplement (PMC4132756; doi:10.1093/nar/gku647), 2014-07-23
Supplement: supp_gku647_nar-01056-x-2014-File006.pdf [file supp_gku647_nar-01056-x-2014-File006.pdf]

**Figure S1:** Relates to Figures 1 and 2

A) Log<sub>2</sub> ChIP/input profiles for Psip1/p75, Mll1, Menin and H3K4me3 across *Hoxb* and *Hoxc* clusters in WT and *Psip1*<sup>-/-</sup> MEFs. A difference plot for Mll1 in *Psip1*<sup>-/-</sup> vs WT cells is also shown

B and C) As in Figure 1B but across the *Myc* and *Shh/Rnf32* loci.

D) Box plots showing the level of Mll1 at *Hoxa*, *b*, *c*, *d* genes and non *Hox* genes represented on the microarray. Regions with a statistically significant (p<0.01) difference in binding between control knockdown (Control Sh, gray boxes) and Psip1/p75 knockdown (p75 KD, white boxes) cells are indicated with an asterisk (\*). Knockdown efficiency of p75 using two shRNAs was validated by immunoblotting (Right) with Psip1.  $\beta$ -actin served as a loading control.

**Figure S2:**

A) Gene ontology (GO) terms enriched (Log<sub>2</sub> p value) at genes differentially expressed (p<0.01) between WT and *Psip1*<sup>-/-</sup> MEFs.

B) Mean (+/- s.e.m., n=3) expression of several *Hoxa*, *Hoxb* and *Hoxc* genes normalized to Gapdh assayed by RT-qPCR, in *Psip1*<sup>g/gt</sup> primary MEFs (black bars) relative to WT MEFs derived from same litter mate embryos (gray bars) (Sutherland et al 2007; Pradeepa et al. 2012).

C) Graphs showing Log<sub>2</sub> signal for runon RNA (similar to Figure 3F and G) in WT (grey lines) and *Psip1*<sup>-/-</sup> (black lines) MEFs in 1000bp windows surrounding the transcription start site (TSS) or transcription end site (TES) of expressed non-*Hox* genes and non-expressed genes from the 3' portions of *Hoxa* and *Hoxd* (top), and expressed genes from 5' portion of *Hoxa* and *Hoxd* (bottom). Arrows under TSS indicates the direction of transcription.

**Figure S3:** Relates to Figure 4

A) HA Pulldown experiment: Empty vector, HA-p52 and HA-p75 immunoprecipitates and 5% input (vector transfected) were immunoblotted with Mll1, Bmi1, Ring1B, Ezh2 and HA tag antibodies.

B) Mean Log<sub>2</sub> ChIP/input for Bmi1, Ctbp1, Cbx4 and Ring1B in WT and *Psip1*<sup>-/-</sup> MEFs over *Hoxb* (left), *Hoxc* (middle) clusters, Olig2 and Myc (right) loci from custom tiling arrays.

## References

- Pradeepa, M.M., Sutherland, H.G., Ule, J., Grimes, G.R. and Bickmore, W.A. (2012) Psip1/Ledgf p52 Binds Methylated Histone H3K36 and Splicing Factors and Contributes to the Regulation of Alternative Splicing. *PLoS Genet*, **8**, e1002717.
- Sutherland, H.G., Newton, K., Brownstein, D.G., Holmes, M.C., Kress, C., Semple, C.A. and Bickmore, W.A. (2006) Disruption of Ledgf/Psip1 results in perinatal mortality and homeotic skeletal transformations. *Mol. Cell. Biol.*, **26**, 7201–7210.

**Table S1:** Relates to Figure 3 and Figure 4,

**List of primers used for qPCR**

|                              | <b>Forward</b>          | <b>Reverse</b>           |
|------------------------------|-------------------------|--------------------------|
| Hoxa1                        | TCCAGCGCAGACCTTTGACTG   | GCTCTGTGAGCTGCTTGGTG     |
| Hoxa2                        | CTGCCTCGGCCACAAAGAATCC  | AGCTGAGTGTTGGTGTACGCG    |
| Hoxa4                        | ACCCCTGGATGAAGAAGATCCAC | TCGCATCTTGGTGTGGGAAGTT   |
| Hoxa5                        | CCGCTCAGCCCCAGATCTACC   | GTCAGGTAGCGGTTGAAGTGGA   |
| Hoxa6                        | CACCGACCGGAAGTACACAAG   | TGTCTGGTAGCGCGTGTAGGTC   |
| HoxA7                        | AAGCCAGTTTCCGCATCTACC   | GTAGCGGTTGAAATGGAATCC    |
| Hoxa9                        | AGAAAAACAACCCAGCGAAG    | CAGTTCCAGCGTCTGGTGT      |
| Hoxa10                       | GTGTCAAGTCCTGAATGGGC    | AGAGAAACCAGGCCTGGACT     |
| Hoxa11                       | CACTGAGGACAAGGCCGGTG    | TTGAGCATGCGGGACAGTTG     |
| Hoxa13                       | CACCTCTGGAAGTCCACTCT    | CTCTCAGAGAGGTTTGTCTGG    |
| Hoxd10                       | GTGCAGGAGAAGGAAAGCAAAG  | TAACGCTCTTACTGATCTCTAGGC |
| Hoxd13                       | AGTCCTGGACGCTAGCCAACG   | GTAGACGCACATGTCCGGCTG    |
| Hoxb2                        | TCCGAGGTCGGATCACCATCAG  | CTGGAACCAGACTTTGACCTGC   |
| Hoxb4                        | CTGGATGCGCAAAGTTCACGTG  | GCGTCAGGTAGCGATTGTAGTGA  |
| Hoxb7                        | CGGCCGAGAGTAACTTCCGGA   | GTGTGCGCGATCTCGATGCG     |
| Hoxb9                        | AGGAAGCGAGGACAAAGAGAGG  | CTTGTCTCTCACTCAGATTGAG   |
| Hoxc5                        | TGAACCCTGGGATGTACAGT    | TAACTGGTTCGGGACCGCTT     |
| Hoxc6                        | GACCAGAAAGCCAGTATCCAGA  | CTTTTCCTCTTTCCGCCCA      |
| <b>ChIP qPCR<br/>Primers</b> |                         |                          |
| Hoxa9p                       | GGAGGGAGGGGAGTAACAAAA   | GGAAAATCGCCAGTCAACATC    |
| Hoxa9Exon1                   | ATCACCACCACCACCCTAC     | CAGGGACAAAGTGTGAGTGTCA   |
| Hoxa9Exon2                   | GATGCCCTACACAAAACACC    | GCTCGGTCCTTGTTGATTTTC    |
| Olig2 pro                    | GCCTGACGCTACAGTGACAA    | GGCTAATTCGCTCAATGAA      |
| Hoxa10 pro                   | ATGTTTGAGGCCGTACTGGT    | CTTCCCAAAGTGGCTGGTAA     |

|           |                      |                      |
|-----------|----------------------|----------------------|
| Hoxa10 E2 | TTGCTTGCTGGCTAAAATC  | ACGAAAATCCACCAGTTCCA |
| Hoxa11 p  | AGCCCAATGATGGATTTTGA | GAAGGGAGGCTGGAGAAATC |
| Ptnp      | AGAGAAGAAGCAGGCTGTGC | GGGTGGGTGCTAAGAACAAA |

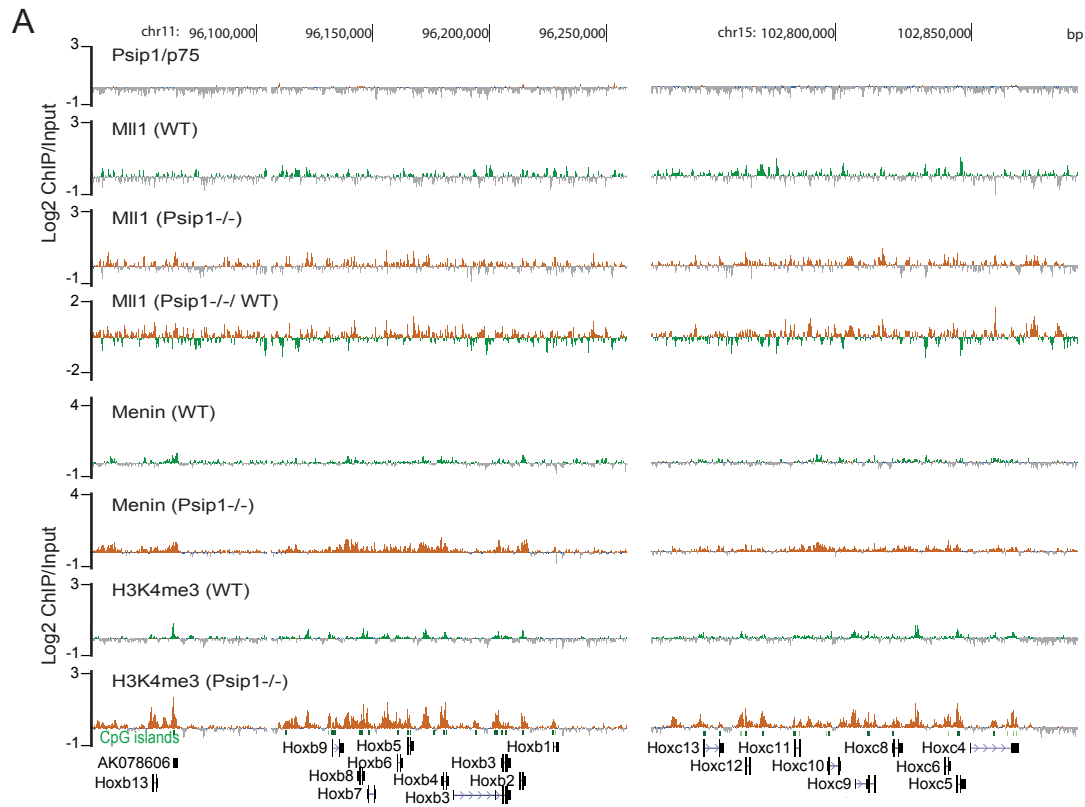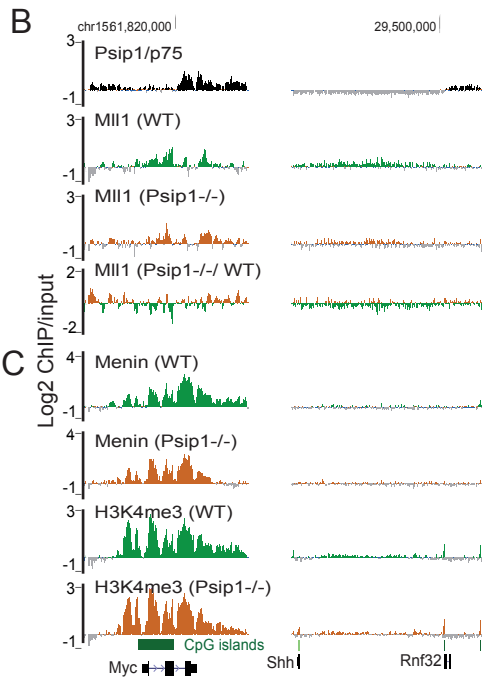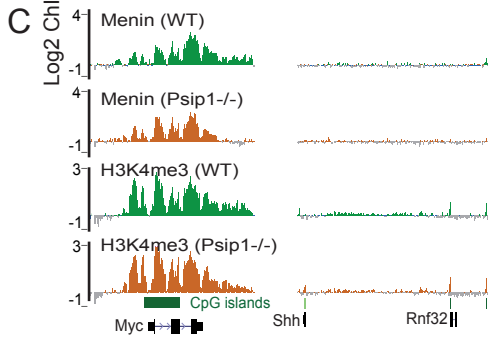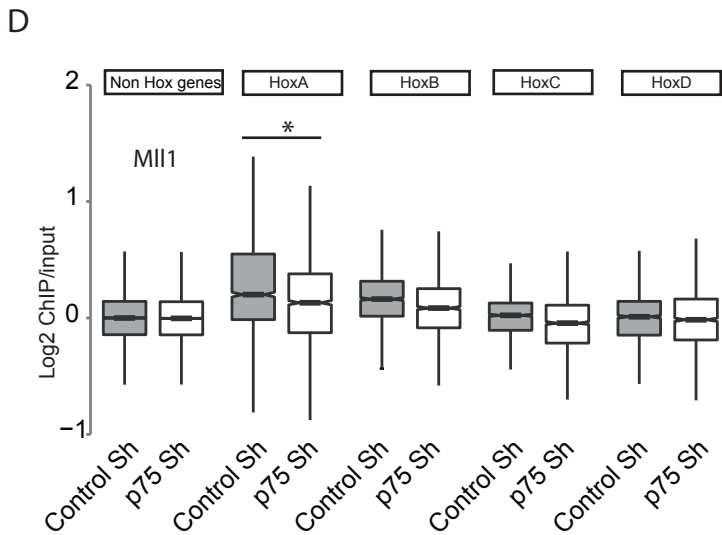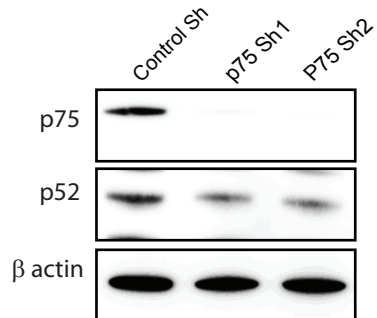

Supplimentary Figure 1

A

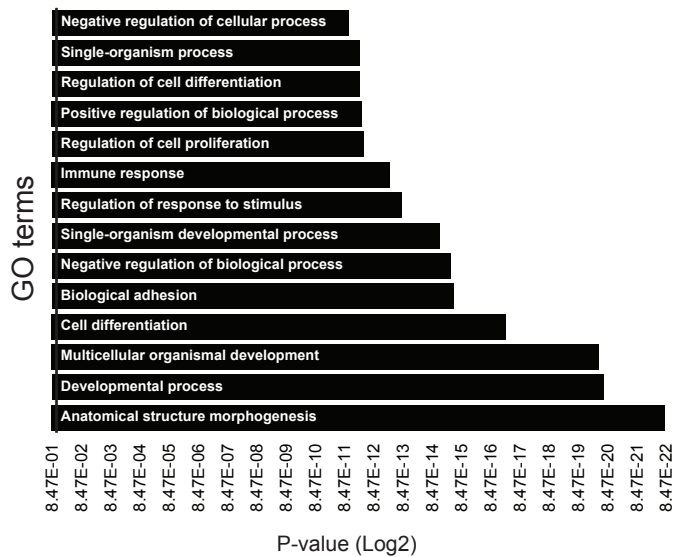

B

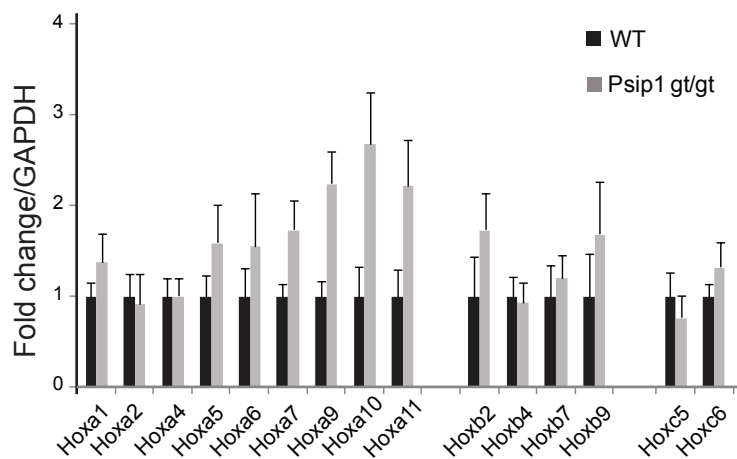

C

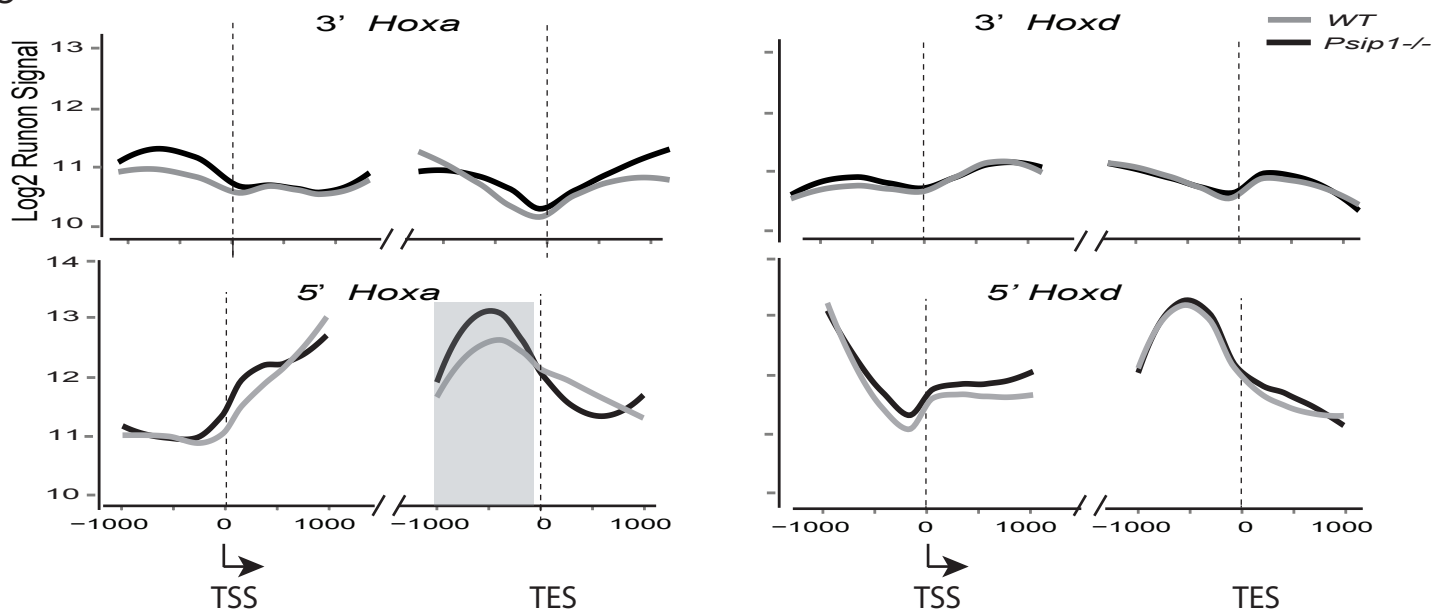

Supplementary Figure 2

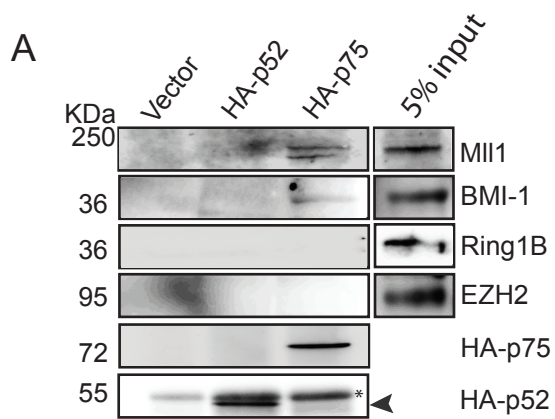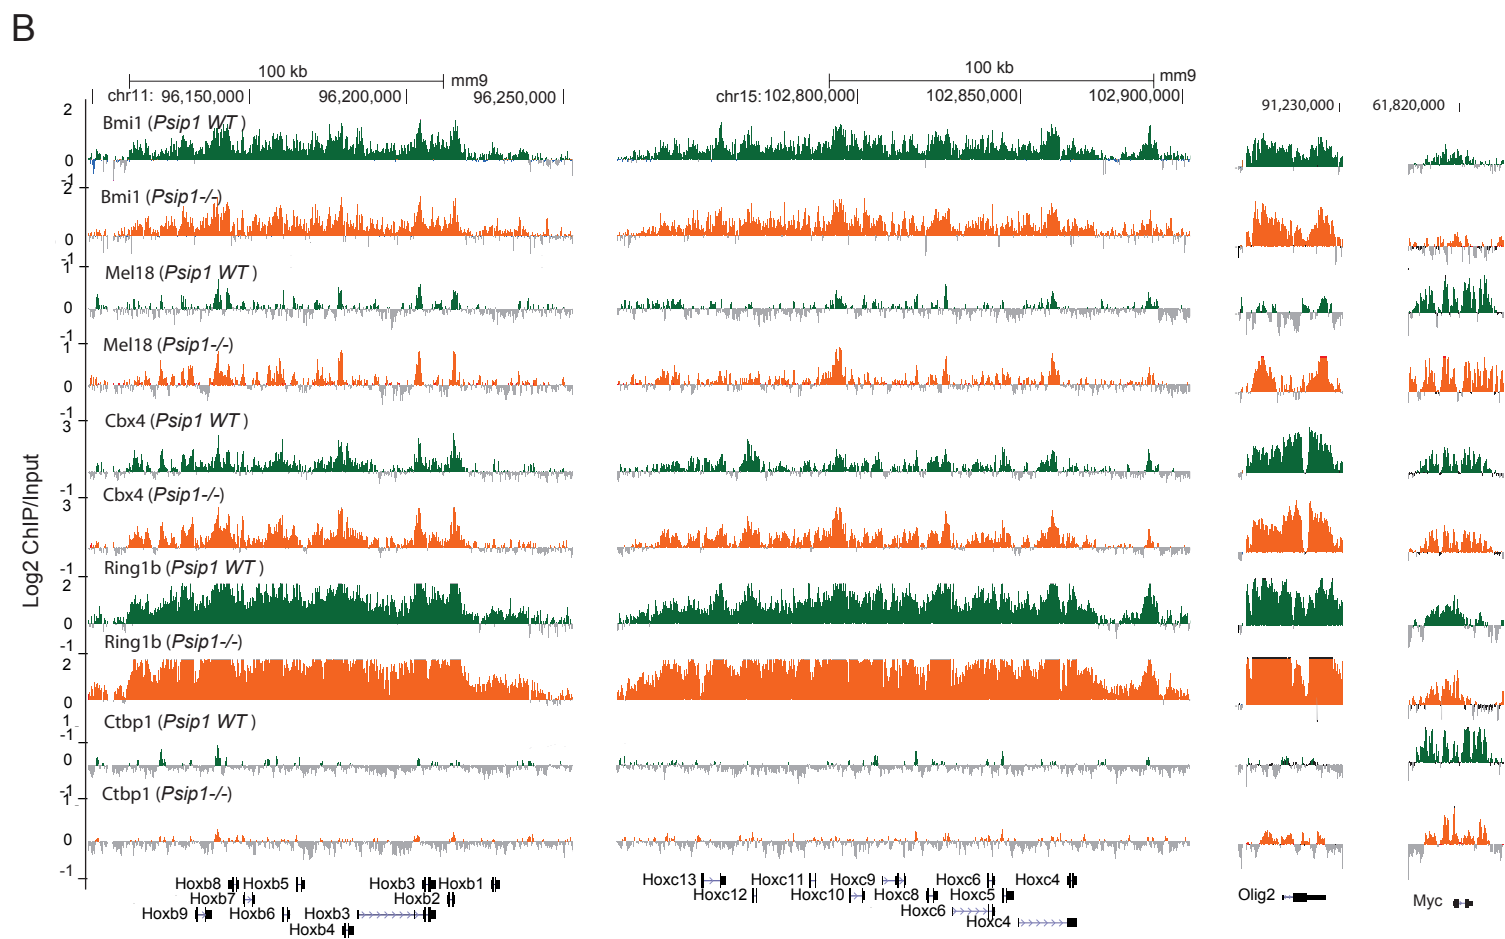

Supplementary Figure 3
